# Supplementary material
Source: PubMed Central journal article supplement (PMC7990129)
Supplement: tby004_supp.pdf [file tby004_supp.pdf]

# **Preclinical Development of Anti-BCMA Immunotoxins Targeting Multiple Myeloma**

Zoe Shancer, Matthew Williams, Austin Igelman, Satoshi Nagata, Tomoko Ise,  
Ira Pastan, and Tapan K. Bera

**Supplementary Figure**

# Supplemental Figure S1

LMB-75

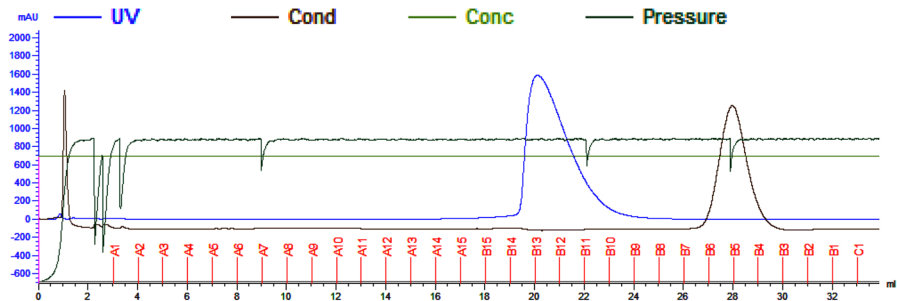

LMB-70

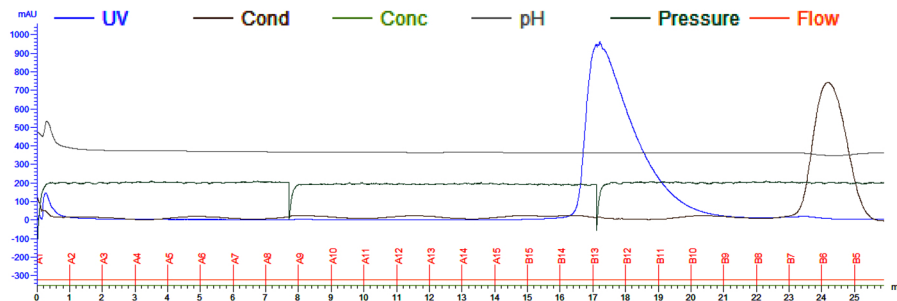

LMB-162

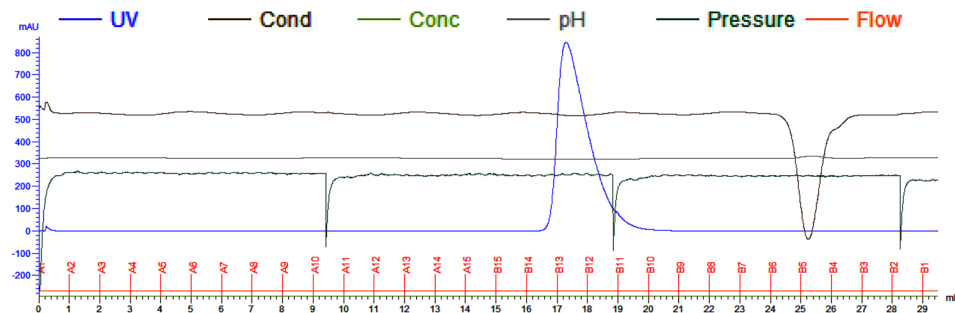

# Supplemental Figure S1 Continued

LMB-173

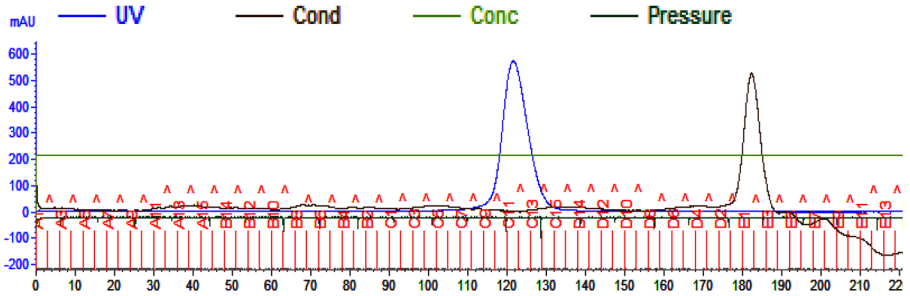

LMB-232

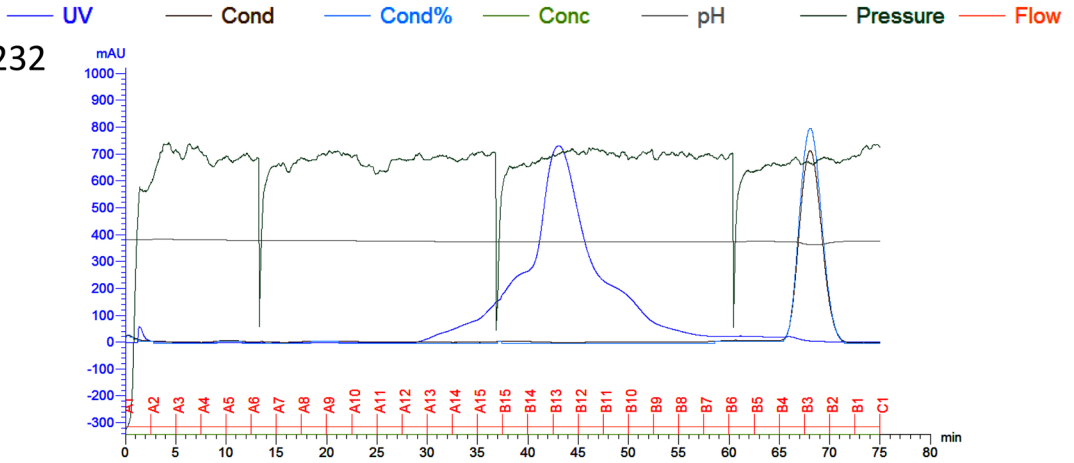

LMB-234

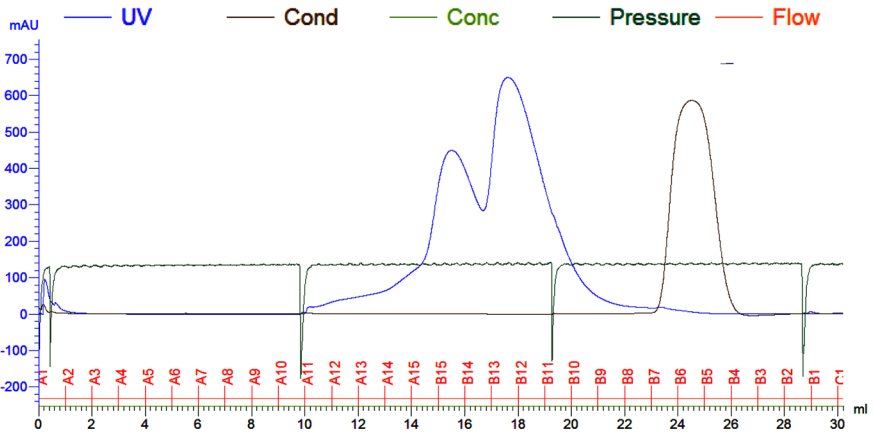

# Supplemental Figure S1 Continued

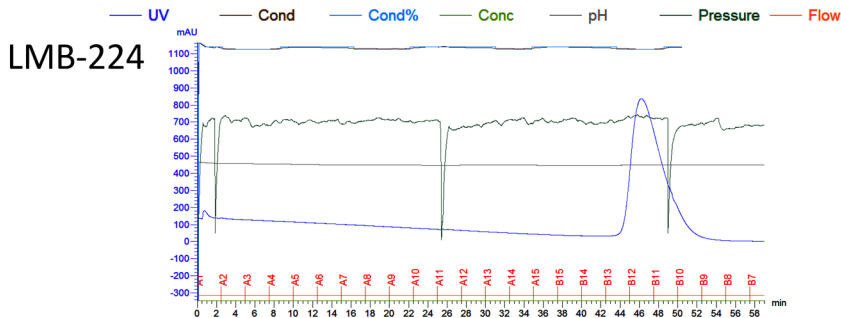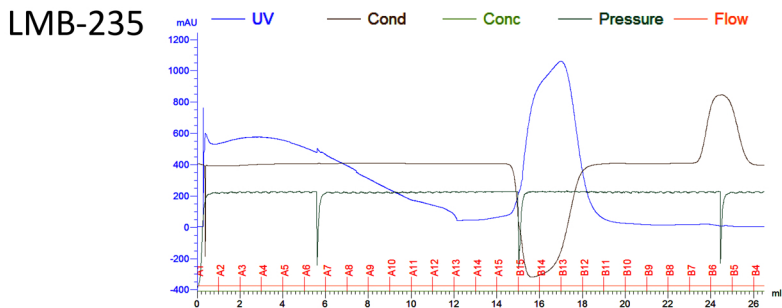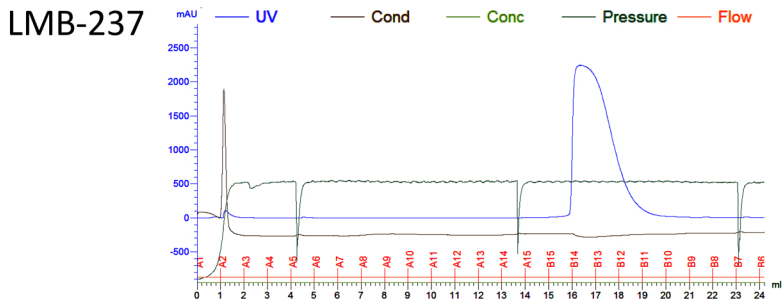



Size exclusion chromatography profile of various anti-BCMA immunotoxin.
